# Supplementary material for: Advancing triage of acute lymphoblastic leukaemia subtypes diagnosis: label-free Raman spectroscopy for precise single-cell phenotyping and subtype classification
Source: Royal Society of Chemistry journal article supplement (doi:10.1039/d4an00956h), 2024-01-01
Supplement: d4an00956h1.pdf [file d4an00956h1.pdf]

## **Advancing Triage of Acute Lymphoblastic Leukemia Subtypes Diagnosis: Label-Free Raman Spectroscopy for Precise Single-Cell Phenotyping and Subtype Classification**

Patrycja Leszczenko<sup>a,b</sup>, Anna M. Nowakowska<sup>a</sup>, Patrycja Dawiec<sup>a,b</sup>, Karolina Czuja<sup>a</sup>, Justyna Jakubowska<sup>c</sup>, Marta Zabczynska<sup>c</sup>, Agata Pastorcza<sup>c,d</sup>, Kinga Ostrowska<sup>c,\*</sup>, Szymon Tott<sup>a</sup>, Wojciech Mlynarski<sup>c,d</sup>, Malgorzata Baranska<sup>a,c</sup>, Katarzyna Majzner<sup>a,\*</sup>

<sup>a</sup> Jagiellonian University, Faculty of Chemistry, Department of Chemical Physics, Gronostajowa 2, 30-387 Krakow, Poland

<sup>b</sup> Jagiellonian University, Doctoral School of Exact and Natural Sciences, Lojasiewicza 11, 30-348 Krakow, Poland

<sup>c</sup> Medical University of Lodz, Department of Pediatric, Oncology and Hematology, Sporna 36/50, 91-738 Lodz, Poland

<sup>d</sup> Medical University of Lodz, Department of Genetic Predisposition to Cancer, Czechoslowacka 4, 92-216 Lodz, Poland

<sup>e</sup> Jagiellonian University, Jagiellonian Centre for Experimental Therapeutics, Bobrzynskiego 14, 30-348 Krakow, Poland

\* Corresponding Authors. K. Ostrowska: [kinga.ostrowska@umed.lodz.pl](mailto:kinga.ostrowska@umed.lodz.pl), K. Majzner: [katarzyna.b.majzner@uj.edu.pl](mailto:katarzyna.b.majzner@uj.edu.pl), +48 12 686 24 00

Supplementary Materials

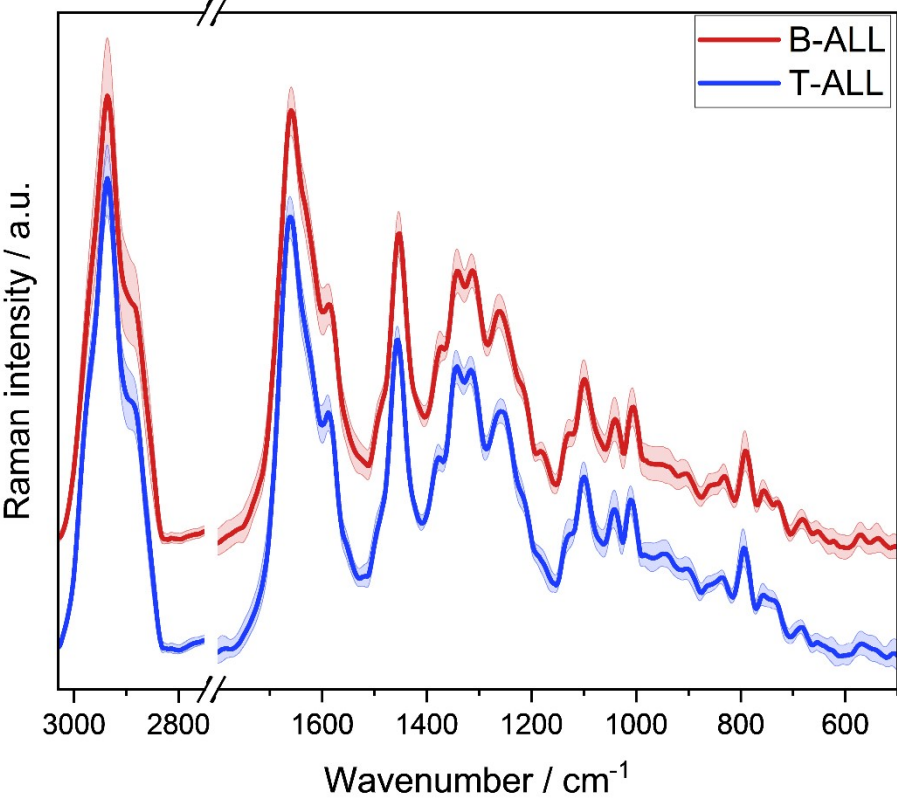

**Fig. S1** Comparison of averaged Raman spectra and the respective standard deviation of B-ALL (518 cells) and T-ALL (430 cells).

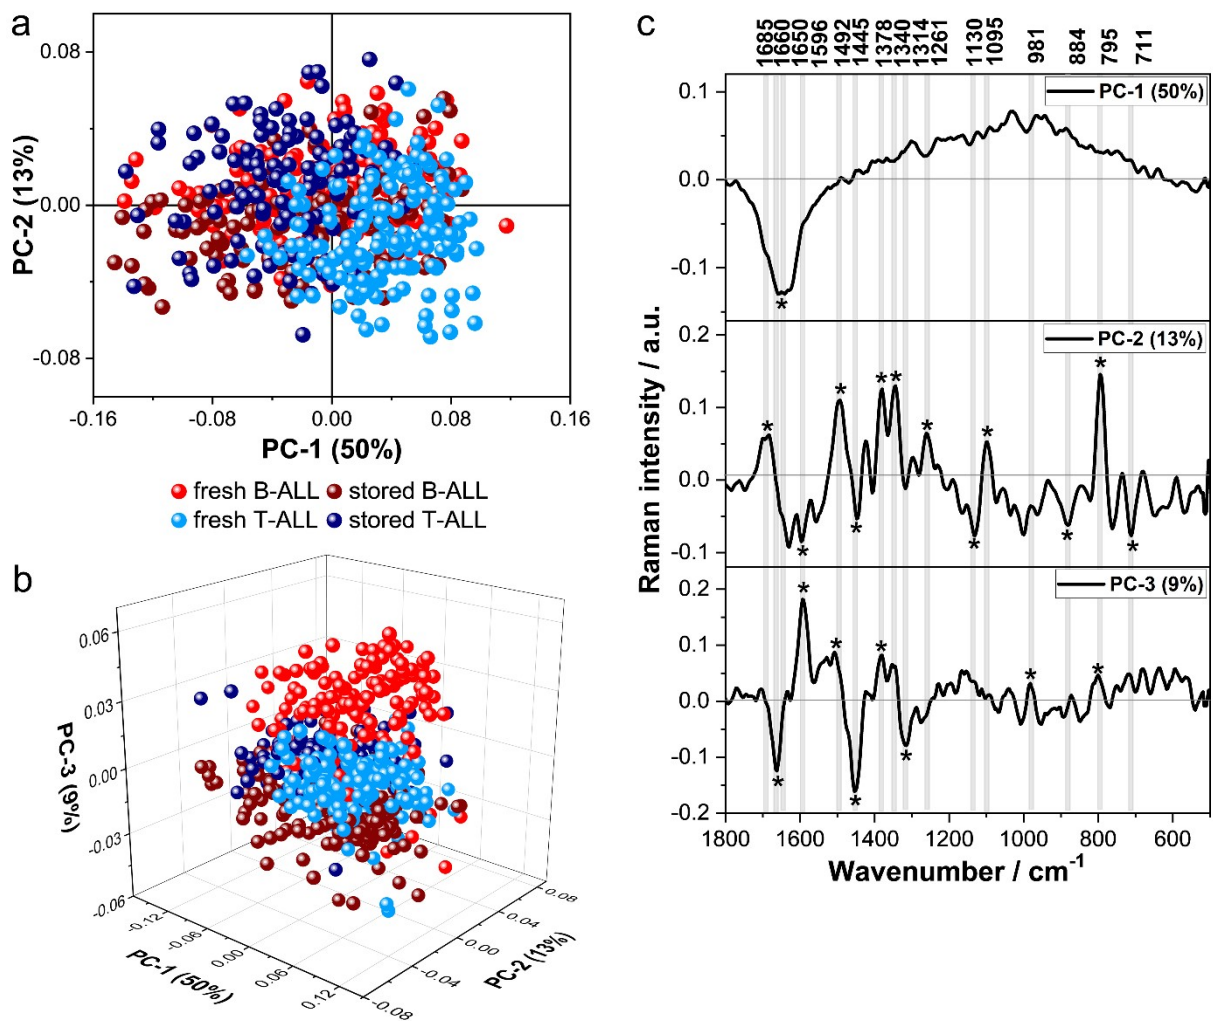

**Fig. S2** The 2D score plot (A), 3D score plot (B), and loadings (C) of PCA representative for B-ALL and T-ALL lymphoblasts including the method of handling of the samples – stored B-ALL (claret,  $n = 230$ ), fresh B-ALL (red,  $n = 288$ ), stored T-ALL (navy,  $n = 201$ ) and fresh T-ALL (bright blue,  $n = 229$ ), in the spectral range of 1800-500  $\text{cm}^{-1}$ ; laser excitation of  $\lambda = 532 \text{ nm}$ .
